# Supplementary material
Source: PubMed Central journal article supplement (PMC3325770)
Supplement: ijbmb0003-0046-f6.pdf [file ijbmb0003-0046-f6.pdf]

## **Supplementary Data**

Hedgehog signaling activation in the development of squamous cell carcinoma and  
adenocarcinoma of esophagus

Ling Yang<sup>1,2,3</sup>, Li-Shu Wang<sup>4</sup>, Xiaoxin Chen<sup>5</sup>, Zoran Gatalica<sup>6</sup>, Suimin Qiu<sup>7</sup>, Zhihua Liu<sup>8</sup>, Gary  
Stoner<sup>9</sup>, Hongwei Zhang<sup>2</sup>, Heidi Weiss<sup>10</sup> and Jingwu Xie<sup>1</sup>

**Supplementary Figures (Fig.S1-3)**

**Supplementary Tables (Tables S1- )**

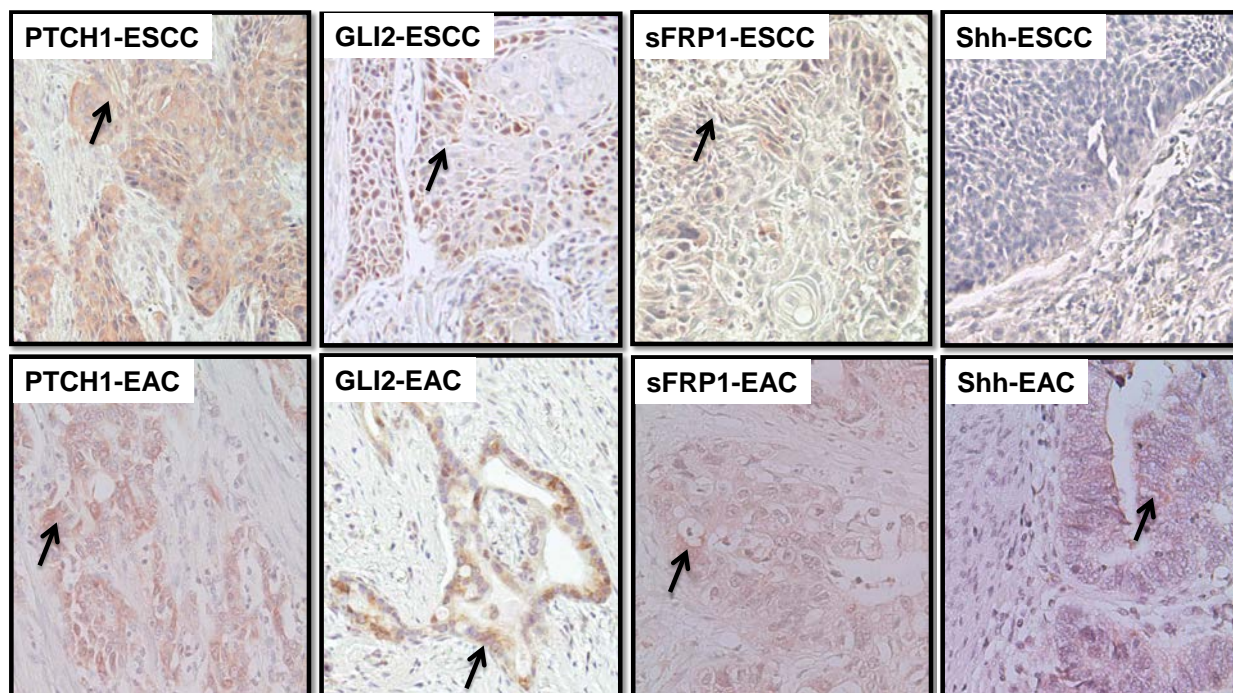

**Fig. S1 Detection of Hh signaling proteins in esophageal cancer.** Expression of PTCH1, GLI2, sFRP1 and Shh was detected by immunohistochemistry using specific antibodies (see methods for details). Positive staining was in red or brown (indicated by arrows). Please note that Shh was not detectable in ESCC, and PTCH1 staining gave the best picture of all the Hh target proteins tested.

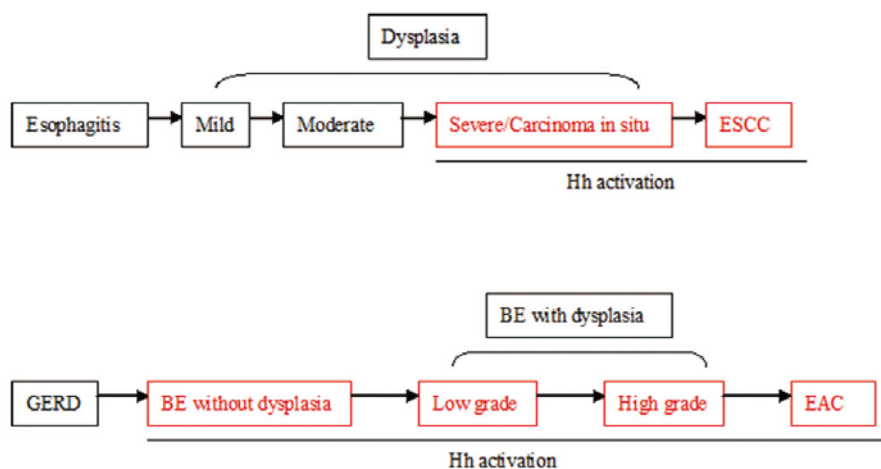

**Fig. S2 Model of Hh signaling activation in esophageal cancers.** Based on our data in this manuscript, we proposed that two subtypes of esophageal cancer are different in the timing of Hh signaling activation. In ESCC, Hh signaling is activated in carcinoma in situ or severe squamous dysplasia. In contrast, Hh signaling is activated in Barrett's esophagus without dysplasia. In addition to the timing, we found that Shh expression was rarely detected in our ESCC specimens whereas Shh expression was common in EAC, suggesting that the mechanisms for Hh signaling activation differ in these two subtypes of esophageal cancer.

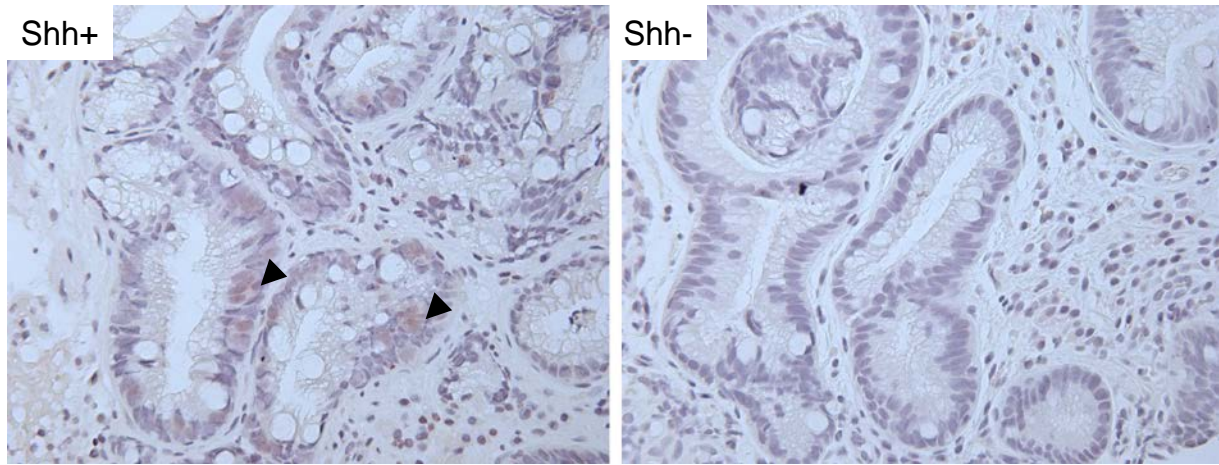

**Fig.S3 Expression of Shh in Barrett's esophagus.** Expression of Shh was detected by IHC with specific antibodies (brown as indicated by arrow heads) (see methods for details). Please note that Shh staining was seen all in the epithelium. The left one showed Shh positive staining, and the right one showed negative staining.

**Table S2- PTCH1/GLI2 expression in premalignant dysplastic lesions**

| Specimen # | Sex | Age | Pathology                                  | PTCH1/GLI2 |
|------------|-----|-----|--------------------------------------------|------------|
| 263245     | M   | 69  | Carcinoma <i>in situ</i>                   | +          |
| 263342     | M   | 52  | mild dysplasia                             | -          |
| 263345     | M   | 59  | mild dysplasia                             | -          |
| 263698     | M   | 67  | in situ carcinoma                          | -          |
| 264297     | M   | 48  | moderate dysplasia                         | -          |
| 266039     | M   | 68  | mild dysplasia                             | -          |
| 266085     | M   | 62  | moderate dysplasia                         | -          |
| 266844     | F   | 60  | moderate-severe dysplasia                  | -          |
| 266844     | F   | 60  | carcinoma <i>in situ</i>                   | +          |
| 266843     | F   | 65  | severe dysplasia- carcinoma <i>in situ</i> | +          |
| 267213     | M   | 74  | carcinoma <i>in situ</i>                   | +          |
| 267908     | M   | 55  | carcinoma <i>in situ</i>                   | +          |
| 267974     | F   | 68  | moderate-severe dysplasia                  | -          |
| 268336     | M   | 42  | mild dysplasia                             | -          |
| 268770     | F   | 72  | severe dysplasia-carcinoma <i>in situ</i>  | -          |
| 269407     | M   | 60  | Carcinoma <i>in situ</i>                   | -          |
| 270204     | M   | 55  | mild dysplasia                             | -          |
| 271020     | M   | 53  | carcinoma <i>in situ</i>                   | -          |
| 271976     | M   | 62  | mild dysplasia                             | -          |
| 273126     | M   | 69  | severe dysplasia-carcinoma <i>in situ</i>  | -          |
| 273146     | M   | 70  | moderate dysplasia                         | -          |
| 273452     | M   | 60  | severe dysplasia- carcinoma <i>in situ</i> | -          |
| 273452     | M   | 60  | mild dysplasia                             | -          |
| C43        | F   | 56  | in situ carcinoma                          | -          |

Note: Positives are indicated as “+” and negatives as “-”

| <b>Table S2- Barrett's Esophagus</b> |                                          |            |                   |
|--------------------------------------|------------------------------------------|------------|-------------------|
| <b>Specimen#</b>                     | <b>Pathology</b>                         | <b>Shh</b> | <b>PTCH1/GLI2</b> |
| 10232C1                              | Barrett's Esophagus no dysplasia         | -          | +                 |
| 2747B1                               | Barrett's Esophagus no dysplasia         | -          | -                 |
| 1469A1                               | Barrett's Esophagus low grade dysplasia  | -          | +                 |
| 1469B1                               | Barrett's Esophagus no dysplasia         | -          | +                 |
| 1772B1                               | Barrett's Esophagus no dysplasia         | -          | -                 |
| 1772C1                               | Barrett's Esophagus no dysplasia         | -          | -                 |
| 1772E1                               | Barrett's Esophagus no dysplasia         | +          | +                 |
| 2245A1                               | Barrett's Esophagus no dysplasia         | +          | +                 |
| 2510B1                               | Barrett's Esophagus low grade dysplasia  | -          | +                 |
| 2510C1                               | Barrett's Esophagus low grade dysplasia  | +          | -                 |
| 2626A1                               | Barrett's Esophagus low grade dysplasia  | -          | -                 |
| 2626C1                               | Barrett's Esophagus high grade dysplasia | +          | +                 |
| 2747A1                               | Barrett's Esophagus no dysplasia         | -          | -                 |
| 2768C1                               | Barrett's Esophagus no dysplasia         | +          | +                 |
| 2791B1                               | Barrett's Esophagus no dysplasia         | -          | -                 |
| 2805A1                               | Barrett's Esophagus no dysplasia         | +          | +                 |
| 2805B1                               | Barrett's Esophagus low grade dysplasia  | +          | -                 |
| 2919A1                               | Barrett's Esophagus no dysplasia         | -          | +                 |
| 08535 1A                             | Barrett's Esophagus high grade dysplasia | +          | +                 |

| <b>Table S3- Expression of Ptch1 in rat model of ESCC*</b> |                  |                                           |                   |
|------------------------------------------------------------|------------------|-------------------------------------------|-------------------|
|                                                            | <b>Specimen#</b> | <b>Pathology</b>                          | <b>Ptch1/Gli2</b> |
| wk9                                                        |                  |                                           |                   |
| NMBA                                                       |                  |                                           |                   |
|                                                            | 4                | normal                                    | -                 |
|                                                            | 5                | moderate dysplasia                        | -                 |
|                                                            | 6                | mild dysplasia                            | -                 |
|                                                            | 7                | moderate dysplasia                        | -                 |
|                                                            | 8                | normal                                    | -                 |
| wk15                                                       |                  |                                           |                   |
| NMBA                                                       |                  |                                           |                   |
|                                                            | 90               | mild dysplasia                            | +                 |
|                                                            | 91               | normal-mild dysplasia                     | +                 |
|                                                            | 92               | moderate dysplasia                        | +                 |
|                                                            | 93               | normal-mild dysplasia                     | +                 |
|                                                            | 94               | moderate dysplasia                        | +                 |
| wk35                                                       |                  |                                           |                   |
| NMBA                                                       |                  |                                           |                   |
|                                                            | 333              | severe dysplasia/carcinoma <i>in situ</i> | +                 |
|                                                            | 347              | severe dysplasia/carcinoma <i>in situ</i> | +                 |
|                                                            | 349              | normal-mild dysplasia                     | -                 |
|                                                            | 354              | mild dysplasia                            | +                 |
|                                                            | 355              | mild dysplasia                            | -                 |

\*Positive staining was indicated as + and negative staining was indicated as -
